# Supplementary material
Source: PubMed Central journal article supplement (PMC4808773)
Supplement: 10.1194_M066381_jlr.M066381-1.pdf [file 10.1194_M066381_jlr.M066381-1.pdf]

# **SUPPLEMENTARY MATERIALS**

## **Structural Elements That Govern Sec14-like Phosphatidylinositol Transfer Protein Sensitivities to Potent Small Molecule Inhibitors**

**Danish Khan<sup>1</sup>, Kaitlyn R. McGrath<sup>1</sup>, Oleksandra Dorosheva<sup>1</sup>, Vytas A.  
Bankaitis<sup>1,2,3\*</sup> and Ashutosh Tripathi<sup>2\*</sup>**

**<sup>1</sup>Department of Biochemistry & Biophysics**

**Texas A&M University**

**College Station, Texas 77843-2128, USA**

**<sup>2</sup>Department of Molecular and Cellular Medicine**

**College of Medicine**

**Texas A&M Health Sciences Center**

**College Station, Texas 77843-1114, USA**

**<sup>3</sup>Department of Chemistry**

**Texas A&M University**

**College Station, Texas 77843-2128**

## **Legend to Supplementary Movie S1**

**Supplementary Movie S1. Molecular dynamics simulation of NPPM bound in the Sec14 hydrophobic cavity showing interconversion between two bound poses.** The movie shows a 10 ns all atom MD simulation of a Sec14::NPPM 6748-481 complex in explicit waters. NPPM 6748-481 is rendered in ball & stick representation and water as anti-aliased stick model, protein secondary structure in ribbon cartoon and pocket residues rendered in stick models. Later in the movie, for clarity, only pocket residues are shown 4.5 Å around the NPPM 6748-481. Note the rotation of the activated aryl halide group of the NPPM to achieve alternate binding modes based on previous docking and mutagenesis studies (14). Numbering of residues is offset by -3, as numbering in homology model started from 1 while numbering started from 4 in the crystal structure template (PDB: 1AUA). So, residue Ser170 in homology model corresponds to residue Ser173 in the crystal structure.

## Supplementary Figure Legends

**Supplementary Figure S1. Genetic screen for NPPM-resistant *SEC14* alleles.** *A*, a schematic representation of the unbiased genetic screen for NPPM-resistant Sec14 proteins is illustrated. Approximately  $10^7$  cells were seeded onto each individual YPD agar plate supplemented with the appropriate NPPM (10 $\mu$ M final concentration). After the indicated period of incubation, NPPM resistant (NPPM<sup>R</sup>) colonies were purified by two rounds of streaking for isolated colonies on NPPM-containing agar plates. The corresponding *SEC14* genes were amplified by PCR from genomic DNA prepared from isolated NPPM<sup>R</sup> clones using the appropriate oligonucleotide primers (see Materials and Methods, Supplemental Table S1). Nucleotide sequences for each *SEC14* amplicon were determined and analyzed for missense substitutions. *B*, documents that the frequency of colony generation was inversely proportional to the inhibitor potency. Decreased potency of the challenge NPPM came with more rapidly arising NPPM<sup>R</sup> colonies. To reduce screen background (i.e. occurrence of NPPM<sup>R</sup> mutations that did not map to *SEC14*), a *pdr5* $\Delta$  strain that shows increased NPPM-sensitivity was used in a parallel genetic screen.

**Supplementary Figure S2. Genetic screen for NPPM-resistant *SEC14* alleles.** The indicated *SEC14* genes were integrated into the *MET17* locus of a *sec14-1<sup>ts</sup> spo14* $\Delta$  strain and expressed under the control of the *S. cerevisiae* *SEC14* promoter to generate strains exhibiting ‘physiological’ levels of each Sec14 variant. The integrants were subsequently dilution spotted onto YPD plates supplemented with vehicle control DMSO or 20 $\mu$ M NPPM, as indicated at top, and incubated at 48hrs at the indicated temperatures. The mock condition documents the phenotype of an isogenic strain where a *SEC14*-less integration cassette was transplanted into the *MET17* locus. That expression of each Sec14 protein was sufficient to rescue *sec14-1<sup>ts</sup>* growth defects at the restrictive temperature of 37°C is demonstrated by comparison of

the growth profiles in the left (25°C) and center (37°C) panels of the integrants relative to mock controls. The NPPM<sup>R</sup> phenotypes are displayed in the right panel. The plates were incubated for 48 h at the indicated temperatures before imaging. The NPPM481-resistance phenotypes were scored at 25°C. Scale bar, 1cm.

# Supplementary Figure S1

A

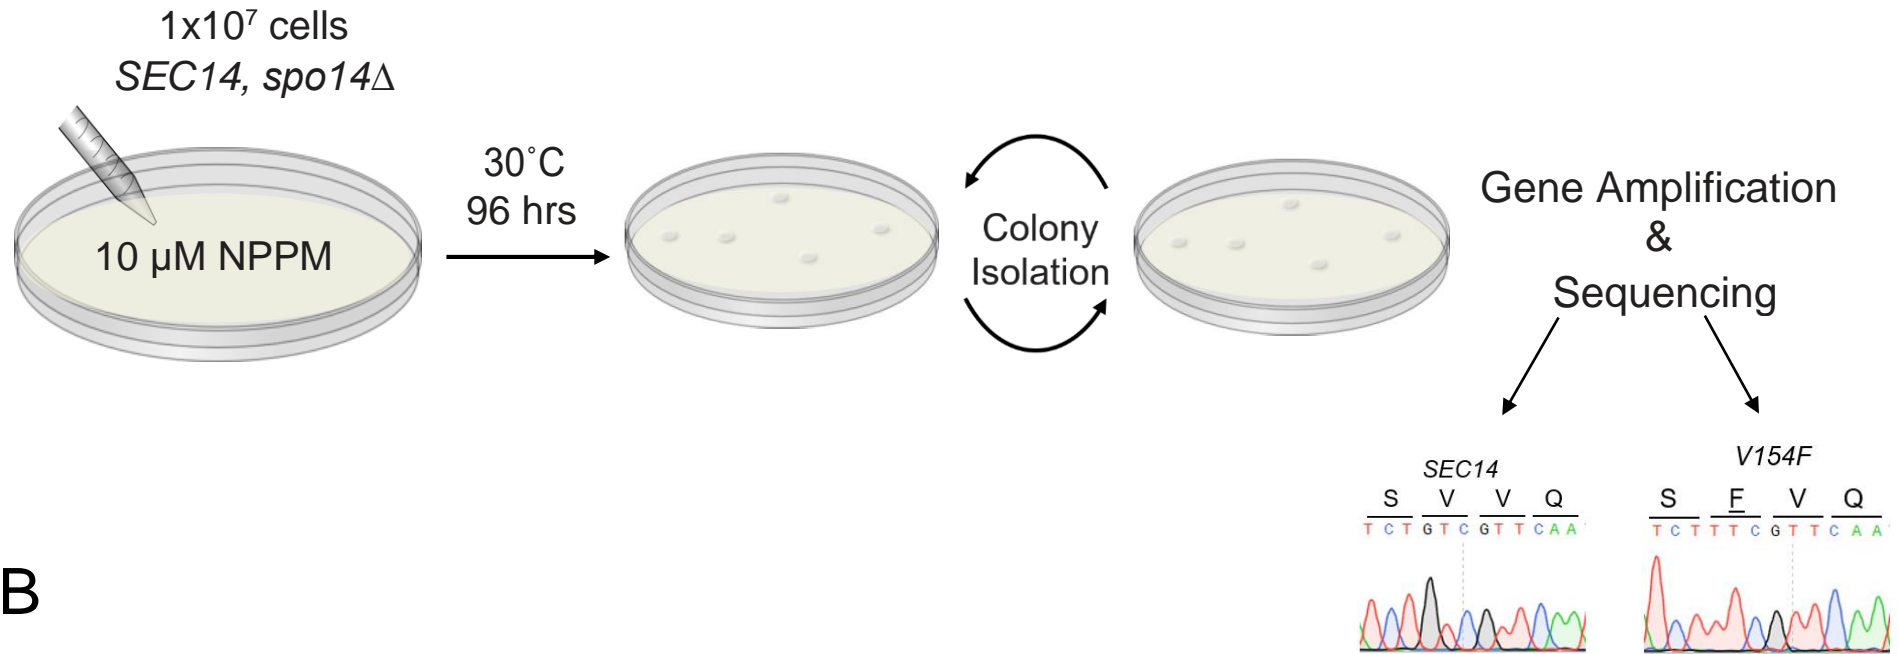

B

| NPPM      |               | Appearance<br>(hrs.) | Frequency<br>(cell/generation) | Sequenced |
|-----------|---------------|----------------------|--------------------------------|-----------|
| 4130-1276 |               | 48                   | 3 x 10 <sup>-5</sup>           | X         |
| 67107-49  |               | 48                   | 3 x 10 <sup>-6</sup>           | X         |
| 6748-481  | <i>PDR5</i>   | 96                   | 1 x 10 <sup>-7</sup>           | 40        |
|           | <i>pdr5</i> Δ | 96                   | 3 x 10 <sup>-8</sup>           | 5         |

# Supplementary Figure S2

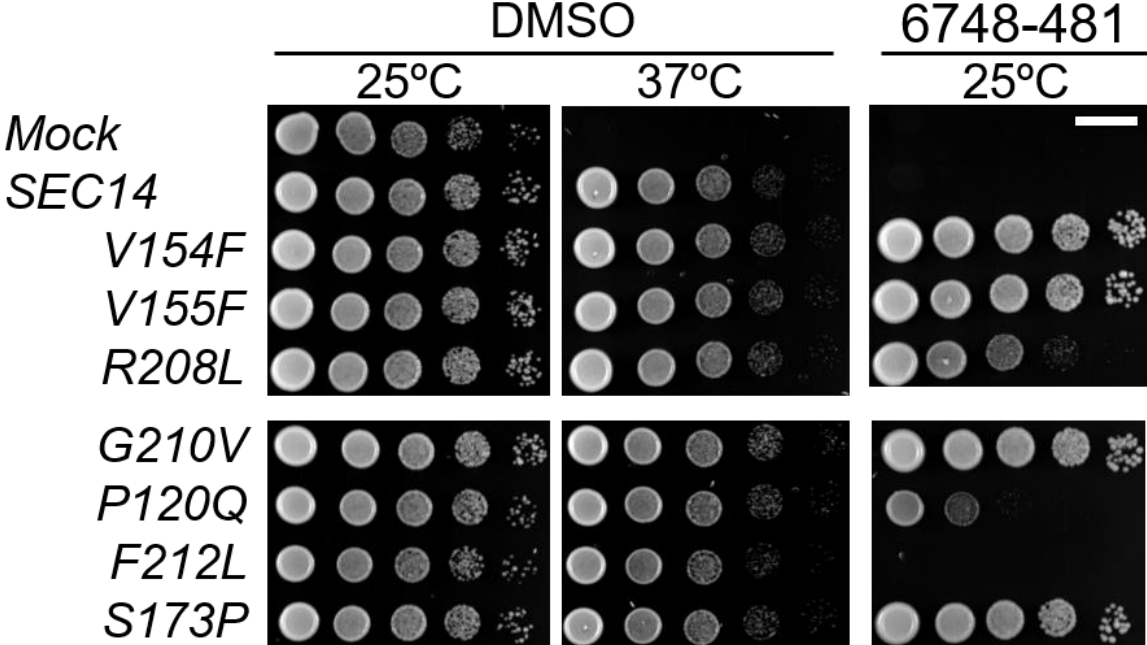

## Supplementary Table S1.

### A. Gene replacement cassette plasmids

| <b>Plasmid</b> | <b>Description</b>                                           | <b>Origin</b> |
|----------------|--------------------------------------------------------------|---------------|
| pVB9           | pBSK( <i>ptr5Δ::GFP, KanMX</i> )                             | This study    |
| pVB16(mock)    | pBSK( <i>leu2Δ::HIS3</i> )                                   | This study    |
| pVB18          | pBSK( <i>leu2Δ::SEC14,HIS3</i> )                             | This study    |
| pVB70          | pVB18( <i>leu2Δ::SEC14 S173C,HIS3</i> )                      | This study    |
| pKM16          | pVB18( <i>leu2Δ::SEC14 P120Q,HIS3</i> )                      | This study    |
| pDK154         | pVB18( <i>leu2Δ::SEC14 V154F,HIS3</i> )                      | This study    |
| pDK155         | pVB18( <i>leu2Δ::SEC14 V155F,HIS3</i> )                      | This study    |
| pKM14          | pVB18( <i>leu2Δ::SEC14 S173P,HIS3</i> )                      | This study    |
| pDK156         | pVB18( <i>leu2Δ::SEC14 R208L,HIS3</i> )                      | This study    |
| pDK157         | pVB18( <i>leu2Δ::SEC14 G210V,HIS3</i> )                      | This study    |
| pKM17          | pVB18( <i>leu2Δ::SEC14 F212L,HIS3</i> )                      | This study    |
| pDK257         | pVB18( <i>leu2Δ::SEC14 V154M, V155C ,HIS3</i> )              | This study    |
| pDK9           | pVB18( <i>leu2Δ::SEC14<sub>CA</sub>, HIS3</i> )              | This study    |
| pDK265         | pVB18( <i>leu2Δ::SEC14<sub>CA</sub> M154V, C155V, HIS3</i> ) | This study    |
| pDK248         | pVB18( <i>leu2Δ::SEC14<sub>KL</sub>, HIS3</i> )              | This study    |
| pDK266         | pVB18( <i>leu2Δ::SEC14<sub>KL</sub> F152V, HIS3</i> )        | This study    |
| pDK247         | pVB18( <i>leu2Δ::SEC14<sub>CG</sub>, HIS3</i> )              | This study    |
| pDK267         | pVB18( <i>leu2Δ::SEC14<sub>CG</sub> V152F, HIS3</i> )        | This study    |
| pDK268         | pVB18( <i>leu2Δ::SEC14<sub>CG</sub> V152F, V153F, HIS3</i> ) | This study    |
| pDK80          | pBSK( <i>met17Δ::URA3</i> )                                  | This study    |
| pDK81          | pBSK( <i>met17Δ::SEC14,URA3</i> )                            | This study    |
| pDK239         | pDK81( <i>met17Δ::SEC14 V154F,URA3</i> )                     | This study    |
| pDK240         | pDK81( <i>met17Δ::SEC14 V154A,URA3</i> )                     | This study    |
| pDK241         | pDK81( <i>met17Δ::SEC14 V154E,URA3</i> )                     | This study    |
| pDK242         | pDK81( <i>met17Δ::SEC14 V154Y,URA3</i> )                     | This study    |
| pDK243         | pDK81( <i>met17Δ::SEC14 V155F,URA3</i> )                     | This study    |
| pDK244         | pDK81( <i>met17Δ::SEC14 V155A,URA3</i> )                     | This study    |
| pDK245         | pDK81( <i>met17Δ::SEC14 V155E,URA3</i> )                     | This study    |
| pDK246         | pDK81( <i>met17Δ::SEC14 V155Y,URA3</i> )                     | This study    |
| pDK280         | pDK81( <i>met17Δ::SEC14 F212L,URA3</i> )                     | This study    |
| pDK281         | pDK81( <i>met17Δ::SEC14 S173P,URA3</i> )                     | This study    |
| pDK282         | pDK81( <i>met17Δ::SEC14 P120Q,URA3</i> )                     | This study    |
| pDK283         | pDK81( <i>met17Δ::SEC14 R208L,URA3</i> )                     | This study    |

## B. Yeast plasmids.

| <b>Plasmid</b> | <b>Description</b>                           | <b>Origin</b> |
|----------------|----------------------------------------------|---------------|
| pCTY1716       | YCp( <i>SFH1</i> , <i>URA3</i> )             | (22)          |
| pCTY1727       | YCp( <i>SFH1 E126A</i> , <i>URA3</i> )       | (22)          |
| pDK252         | YCp( <i>SFH1 F156V</i> , <i>URA3</i> )       | This study    |
| pDK255         | YCp( <i>SFH1 F156V A157V</i> , <i>URA3</i> ) | This study    |



## Supplementary Table S2. Primers used.

|        |                                                          |                                                             |
|--------|----------------------------------------------------------|-------------------------------------------------------------|
| DKO98  | To subclone <i>SEC14</i> into pVB16 at <i>SacII</i> ,    | aaaccgcgatggttacagtatgttgtgc                                |
| DKO99  | <i>SphI</i> sites                                        | tttgcattgctcatttcacgaaaaggcttccgg                           |
| DKO107 | To generate <i>SEC14</i> V154F by                        | cttggtttgggaatacgaatcttctgtcaatacagattacctgcc               |
| DKO108 | mutagenesis                                              | ggcaggtaatctgtattgaacgaagattcgtattcccaaaccaag               |
| DKO105 | To generate <i>SEC14</i> V155F by                        | ggttgggaatacgaatctgtctttcaatacagattacctgcctg                |
| DKO106 | mutagenesis                                              | caggcaggtaatctgtattgaaagacagattcgtattcccaaacc               |
| DKO201 | To generate <i>SEC14</i> S173P by                        | ctgtgcacctagtg gaaactccatgtacaattat ggtttgaaa g             |
| DKO202 | mutagenesis                                              | ctttcaaatccataattgtacatggagtctccactaggtgaccag               |
| DKO109 | To generate <i>SEC14</i> R208L by                        | cataagtcaaaactattaccccgaacttatgggtaaattttacatcatc           |
| DKO110 | mutagenesis                                              | gatgatgtaaaatttaccataagtccgggtaaatgtttgacttatg              |
| DKO111 | To generate <i>SEC14</i> G210V by                        | caaaactattaccccgaacgtatggttaaattttacatcatcaacgcgcc          |
| DKO112 | mutagenesis                                              | ggcgcgttgatgatgtaaaatttaaccatacgttcgggtaaatagtttg           |
| KMO104 | To generate <i>SEC14</i> P120Q by                        | cataaaaccgataaagatggccgc caa gtattttgagaattaggtg            |
| KMO105 | mutagenesis                                              | cacctaattcttcaaaatatacttggcggccatctttatcggtttatg            |
| KMO106 | To generate <i>SEC14</i> F212L by                        | ctattaccccgaacgtatgggtaaa ctt ttttcatcatcaacgcgccattc       |
| KMO107 | mutagenesis                                              | gaatggcgcgttgatgatgtaaaaaagtttaccatacgttcgggtaaatg          |
| DKO189 | To generate <i>SEC14</i> V155A by                        | ggttgggaatacgaatctgtcgtcaatacagattacctgcctgttc              |
| DKO190 | mutagenesis                                              | gaacaggcaggtaatctgtattgagcgcagattcgtattcccaaacc             |
| DKO191 | To generate <i>SEC14</i> V155E by                        | ggttgggaatacgaatct gtcgaacaata cagattacct gcctgttc          |
| DKO192 | mutagenesis                                              | gaacaggcaggtaatctgtattgttcgacagattcgtattcccaaacc            |
| DKO193 | To generate <i>SEC14</i> V155Y by                        | ggttgggaatacgaatctgtctatcaata cagattacct gcctgttc           |
| DKO194 | mutagenesis                                              | gaacaggcaggtaatctgtattgatagacagattcgtattcccaaacc            |
| DKO195 | To generate <i>SEC14</i> V154A by                        | cttggtttgggaatacgaatctgccgttcaata cagattacct gcctg          |
| DKO196 | mutagenesis                                              | caggcaggtaatctgtattgaacggcagattcgtattcccaaaccaag            |
| DKO197 | To generate <i>SEC14</i> V154E by                        | cttggtttgggaatacgaatctgaagtcaata cagattacct gcctg           |
| DKO198 | mutagenesis                                              | caggcaggtaatctgtattgaactcagattcgtattcccaaaccaag             |
| DKO199 | To generate <i>SEC14</i> V154Y by                        | cttggtttgggaatacgaatcttacgttcaata cagattacct gcctg          |
| DKO200 | mutagenesis                                              | caggcaggtaatctgtattgaacgtaagattcgtattcccaaaccaag            |
| DKO335 | To generate <i>SEC14</i> V154M by                        | gaaaaacttggttgggaatacgaatctatggttcaatacagattacctgc          |
| DKO336 | mutagenesis                                              | gcaggtaatctgtattgaaccatagattcgtattcccaaaccaagttttc          |
| DKO337 | To generate <i>SEC14</i> V154M, V155C by                 | gaaaaacttggttgggaatacgaatct atg tgt caatacagattacctgcctgttc |
| DKO338 | mutagenesis                                              | gaacaggcaggtaatctgtattgacacatagattcgtattcccaaaccaagttttc    |
| DKO1   | To amplify <i>SEC14<sub>CA</sub></i> from gDNA and       | aaaccgcgatgactacgatgactactgaagaaatattggc                    |
| DKO2   | sub-clone into pVB16 at <i>SacII</i> , <i>SphI</i> sites | tttgcattgcttaaatgttataagctctaggacattcacc                    |
| DKO14  | To sub-clone 8His- <i>SEC14<sub>CA</sub></i> into pET28b | aaccatgggtcatcatcatcatcatcatcatcatatgactacgatgactactgaa     |
| DKO15  | at <i>NcoI</i> , <i>SacI</i> sites                       | aagagctctta aatgttataagctctaggacattcacc                     |
| CA84   | To generate <i>SEC14<sub>CA</sub></i> M154V, C155V by    | cttggatgggaatatgaagccgtggttcaatatcgtttacctgcatttc           |
| CA85   | mutagenesis                                              | gaacatgcaggtaaacgatattgaaccacggcttcatattcccataccaag         |
| KL100  | To amplify <i>SEC14<sub>KL</sub></i> from gDNA and       | aaccgcgatggttaagtgaacaagaaattttag                           |
| KL101  | sub-clone into pVB16 at <i>SacII</i> , <i>SphI</i> sites | ttgcatgcttacaattgaaaagcctttggagcttc                         |
| KL90   | To sub-clone 8His- <i>SEC14<sub>KL</sub></i> into pET28b | aaccatgggtcatcatcatcatcatcatcatcatatggttaagt                |
| KL91   | at <i>NcoI</i> , <i>SacI</i> sites                       | aaaagaatttttag                                              |
| KL92   | To generate <i>SEC14<sub>KL</sub></i> without internal   | aagagctcttacaattgaaaagcctttggagcttcacctcaggtccaatgtat       |
| KL93   | <i>NcoI</i> site by silent base-pair exchange and        | ctatatctatccgatattggccttgagagaggaggaatacattggacc            |
|        | mutagenesis                                              | ggtccaatgtattcctcctctctccagggaacaatatcgatagatatag           |

|        |                                                          |                                                          |
|--------|----------------------------------------------------------|----------------------------------------------------------|
| KL95   | To generate <i>SEC14<sub>KL</sub></i> F152V by           | gaacttggctctgggaatacgaagctgtttagatacagattgcctgcatgt tc   |
| KL96   | mutagenesis                                              | gaacatgcaggcaatctgtatctaacaacagcttcgtattcccagaccaagttc   |
| CG102  | To amplify <i>SEC14<sub>CG</sub></i> from gDNA and       | aaccgcggatggtagtgaagcggagttttg                           |
| CG103  | sub-clone into pVB16 at <i>SacII</i> , <i>SphI</i> sites | ttgcatgctatttcatggaaaacatctc                             |
| CG88   | To sub-clone 8His- <i>SEC14<sub>CG</sub></i> into pET28b | aacctgggtcatcatcatcatcatcatcatatg                        |
| CG89   | at <i>NcoI</i> , <i>SacI</i> sites                       | gttagtgaagcggagttttggc                                   |
| CG104  | To generate <i>SEC14<sub>CG</sub></i> without internal   | ttgagctctatttcatggaaaacatctctggggcttcaccttc              |
| CG105  | <i>NcoI</i> site by silent base-pair exchange and        | cctgtacttgccgacatcggcccctggagagacgccaagtacatc            |
| CG112  | mutagenesis                                              | gatgtacttggcgtctctccagggccgatgtcggacaagtacagg            |
| CG113  | To generate <i>SEC14<sub>CG</sub></i> F152V by           | gaacttgggtgtgggagtacgagtc ttt gtaactacagactgcctgcttctc   |
| CG114  | mutagenesis                                              | gagcaagcaggcagctctgtagttgacaaaggactcgtactcccacaccaagttc  |
| CG115  | To generate <i>SEC14<sub>CG</sub></i> F152V, F153V by    | gaacttgggtgtgggagtacgagtccttttcaactacagactgcctgcttctc    |
| DKO94  | mutagenesis                                              | gagcaagcaggcagctctgtagttcaaaaaggactcgtactcccacaccaagttc  |
| DKO95  | To sub-clone <i>SFHI</i> into pVB16 at <i>SacII</i> ,    | aaaccgcggatgacaaccagcatactc                              |
| DKO163 | <i>SphI</i> sites                                        | tttgcatttagctggtaacagtaaatttac                           |
| DKO164 | To generate <i>SFHI</i> F156V by mutagenesis             | gaaacttagtcaaggagtacgaattagttgccacgtaccgggtcccagcgtgttcg |
| DKO147 | To generate <i>SFHI</i> F156V, A157V by                  | cgaacacgctgggacccggtacgtggcaactaattcgtactccttgactaagtttc |
| DKO148 | mutagenesis                                              | cttagtcaaggagtacgaattagttgtcacgtaccgg gtcccagcgt gttcg   |
|        |                                                          | cgaacacgctgggacccggtacgtgacaactaattcgtactccttgactaag     |

### Supplementary Table S3. Protein expression plasmids.

| Plasmid | Description                                                                              | Origin     |
|---------|------------------------------------------------------------------------------------------|------------|
| pRE1201 | pET28b (His <sub>8</sub> - <i>SEC14</i> )                                                | (9)        |
| pDK221  | pET28b (His <sub>8</sub> - <i>SEC14 P120Q</i> )                                          | This study |
| pDK150  | pET28b (His <sub>8</sub> - <i>SEC14 V154F</i> )                                          | This study |
| pDK152  | pET28b (His <sub>8</sub> - <i>SEC14 V155F</i> )                                          | This study |
| pRE1270 | pET28b (His <sub>8</sub> - <i>SEC14 S173C</i> )                                          | (14)       |
| pDK171  | pET28b (His <sub>8</sub> - <i>SEC14 S173P</i> )                                          | This study |
| pDK151  | pET28b (His <sub>8</sub> - <i>SEC14 R208L</i> )                                          | This study |
| pDK153  | pET28b (His <sub>8</sub> - <i>SEC14 G210V</i> )                                          | This study |
| pDK222  | pET28b (His <sub>8</sub> - <i>SEC14 F212L</i> )                                          | This study |
| pDK31   | pET28b (His <sub>8</sub> - <i>SEC14<sub>CA</sub></i> )                                   | This study |
| pDK212  | pET28b (His <sub>8</sub> - <i>SEC14<sub>CA</sub> M154V, C155V</i> )                      | This study |
| pDK262  | pET28b (His <sub>8</sub> - <i>SEC14<sub>KL</sub></i> )                                   | This study |
| pDK269  | pET28b (His <sub>8</sub> - <i>SEC14<sub>KL</sub> F152V</i> )                             | This study |
| pDK261  | pET28b (His <sub>8</sub> - <i>SEC14<sub>CG</sub></i> )                                   | This study |
| pDK270  | pET28b (His <sub>8</sub> - <i>SEC14<sub>CG</sub> V152F</i> )                             | This study |
| pDK271  | pET28b (His <sub>8</sub> - <i>SEC14<sub>CG</sub> V152F, V153F</i> )                      | This study |
| pRE1227 | pET28b (His <sub>8</sub> - <i>SFH1</i> )                                                 | (9)        |
| pRE1234 | pET28b (His <sub>8</sub> - <i>SFH1 E126A</i> )                                           | (22)       |
| pDK77   | pET28b (His <sub>8</sub> - <i>SFH1 F153V, L176M, I193V, V196A, A197S, Q204A, V227F</i> ) | This study |
| pDK149  | pET28b (His <sub>8</sub> - <i>SFH1 E126A, F156V</i> )                                    | This study |
| pDK126  | pET28b (His <sub>8</sub> - <i>SFH1 E126A, F156V, A157V</i> )                             | This study |

**Supplementary Table S4. Intrinsic Sfh1<sup>Q204,6X</sup> PtdIns-transfer activity.**

| <b>Protein</b>          | <b>Activity<br/>(Transfer as % of<br/>input [<sup>3</sup>H]-PtdIns)</b> | <b>Total Input<br/>[<sup>3</sup>H]-PtdIns<br/>(c.p.m.)</b> | <b>Background<br/>(c.p.m.)</b> |
|-------------------------|-------------------------------------------------------------------------|------------------------------------------------------------|--------------------------------|
| Sec14                   | 18-26                                                                   | 8915-10863                                                 | 645-955                        |
| Sfh1 <sup>Q204,6X</sup> | 22-25                                                                   | 8915-10863                                                 | 645-955                        |

**Supplementary Table S5. Intrinsic PtdIns-transfer activities for NPPM<sup>R</sup> Sec14 proteins.**

| <b>Protein</b> | <b>Activity<br/>(Transfer as<br/>% of input<br/>[<sup>3</sup>H]-PtdIns)</b> | <b>Total Input<br/>[<sup>3</sup>H]-PtdIns<br/>(c.p.m.)</b> | <b>Background<br/>(c.p.m.)</b> |
|----------------|-----------------------------------------------------------------------------|------------------------------------------------------------|--------------------------------|
| Sec14          | 16-28                                                                       | 7410-10100                                                 | 530-570                        |
| P120Q*         | -                                                                           | -                                                          | -                              |
| V154F          | 13-18                                                                       | 8510-12125                                                 | 780-1630                       |
| V155F          | 10-20                                                                       | 7400-10915                                                 | 570-870                        |
| S173P*         | -                                                                           | -                                                          | -                              |
| R208L          | 6-10                                                                        | 8500-12125                                                 | 570-1630                       |
| G210V*         | -                                                                           | -                                                          | -                              |
| F212L          | 13-21                                                                       | 7805-10400                                                 | 590-870                        |

\*Insufficient activity for confident assessment (<3% transfer).

**Supplementary Table S6. Intrinsic PtdIns-transfer activities of Sec14-like PITPs and VV-motif variants.**

| <b>Protein</b>                              | <b>Basal Activity (%)</b> | <b>Total Input (c.p.m.)</b> | <b>Background (c.p.m.)</b> |
|---------------------------------------------|---------------------------|-----------------------------|----------------------------|
| Sec14                                       | 18-26                     | 8915-10863                  | 645-955                    |
| Sec14 <sub>CA</sub>                         | 24-27                     | 10243-11080                 | 810-1054                   |
| Sec14 <sub>CA</sub> <sup>M154V, C155V</sup> | 12-18                     | 8955-10470                  | 960-1105                   |
| Sec14 <sub>CG</sub>                         | 22-24                     | 10787-11113                 | 1547-1669                  |
| Sec14 <sub>KL</sub>                         | 20-23                     | 10585-11240                 | 1460-1517                  |
| Sec14 <sub>KL</sub> <sup>F152V</sup>        | 25-27                     | 9421-11133                  | 1226-1330                  |
| Sfh1 <sup>E126A</sup>                       | 18-26                     | 8716-8976                   | 645-955                    |
| Sfh1 <sup>E126A, F156V</sup>                | 19-24                     | 9220-10878                  | 825-980                    |
| Sfh1 <sup>E126A, F156V, A157V</sup>         | 13-16                     | 10510-11285                 | 834-1060                   |
